# Supplementary material
Source: PubMed Central journal article supplement (PMC5571358)
Supplement: AAC.00859-17_zac009176501s1.pdf [file AAC.00859-17_zac009176501s1.pdf]

**Table S1** MICs of 39 fosfomycin-resistance *E. coli* isolates

| Strain | MIC (mg/liter)   |      |      |      |       |      |      |      |
|--------|------------------|------|------|------|-------|------|------|------|
|        | FOF <sup>a</sup> | FFC  | GEN  | AMK  | CIP   | TET  | CTX  | CST  |
| SY301B | >512             | 128  | 128  | 2    | 16    | 64   | >256 | 0.5  |
| SY301F | >512             | 128  | 128  | >256 | 8     | 128  | 256  | 0.5  |
| SY303P | >512             | 256  | 64   | >256 | 8     | 128  | 64   | 0.25 |
| SY301L | >512             | 256  | >256 | >256 | 32    | 128  | 64   | 0.5  |
| SY303M | >512             | 128  | 256  | >256 | 16    | 128  | 128  | 0.5  |
| SY305M | >512             | 128  | 128  | >256 | 16    | 256  | 128  | 0.5  |
| SY286M | >512             | >512 | 128  | >256 | 0.125 | 128  | 128  | 0.5  |
| SY287M | >512             | 256  | 128  | >256 | 0.25  | 128  | 256  | 0.5  |
| SY284B | >512             | 256  | 64   | >256 | 0.125 | 128  | 128  | 0.5  |
| CH293B | >512             | 512  | 256  | >256 | 128   | 64   | >256 | 0.5  |
| CH292B | >512             | 256  | 256  | >256 | 128   | 128  | >256 | 0.5  |
| CH291M | >512             | 128  | >256 | >256 | 16    | 256  | >256 | 0.5  |
| CH281F | >512             | 128  | 128  | 256  | 32    | 128  | >256 | 1    |
| CH282M | >512             | 128  | 64   | 256  | 64    | 128  | 128  | 0.5  |
| CH285F | >512             | >512 | 128  | >256 | 64    | >256 | 128  | 0.5  |
| DH286F | >512             | 256  | 64   | >256 | 16    | >256 | 128  | 0.5  |
| DH286M | >512             | 256  | 64   | >256 | 32    | 128  | 256  | 1    |
| JL12G  | >512             | 256  | >256 | >256 | 32    | 64   | 256  | 1    |
| JL15P  | >512             | 128  | >256 | >256 | 0.5   | 128  | 256  | 0.5  |
| JL17P  | >512             | 4    | 128  | >256 | 0.125 | 128  | 32   | 0.5  |
| JT14G  | >512             | 128  | 256  | 256  | 0.125 | 32   | 128  | 0.5  |
| JT14P  | >512             | 256  | 256  | 128  | 0.25  | 32   | 128  | 1    |
| HL12L  | >512             | 256  | 256  | 4    | 0.125 | 16   | 128  | 0.5  |
| HL36B  | >512             | 128  | 128  | 4    | 0.125 | 128  | 256  | 0.5  |
| HL40C  | >512             | 128  | 128  | 2    | 0.125 | 128  | >256 | 0.5  |
| HB37B  | >512             | >512 | 256  | 256  | 64    | 256  | 64   | 0.5  |
| HB35D  | >512             | 512  | 256  | 256  | 0.25  | 256  | 128  | 0.5  |
| HB38B  | >512             | 4    | 64   | 128  | 8     | 16   | 128  | 0.5  |
| HB38L  | >512             | 256  | 128  | >256 | 32    | 64   | 128  | 0.5  |
| HB18F  | >512             | 256  | 128  | >256 | 64    | 64   | 64   | 1    |
| HB13B  | >512             | 128  | >256 | >256 | 64    | 256  | >256 | 0.5  |
| HB13M  | >512             | 256  | >256 | >256 | 32    | 32   | 128  | 0.5  |
| HB312G | >512             | 256  | 256  | >256 | 16    | 64   | 128  | 1    |
| SH312M | >512             | 512  | 64   | 256  | 16    | 64   | >256 | 0.5  |
| SH312N | >512             | 512  | 64   | 256  | 8     | 128  | >256 | 0.5  |
| SH21F  | >512             | 128  | 32   | 2    | 8     | 256  | >256 | 0.5  |
| SH21G  | >512             | 128  | 128  | 2    | 32    | 256  | 256  | 0.5  |
| SH21M  | >512             | 128  | 128  | 8    | 16    | 256  | 256  | 0.5  |
| SH33L  | >512             | 128  | 64   | 1    | 32    | 32   | 128  | 0.25 |

<sup>a</sup> FOF, fosfomycin; FFC, florfenicol; GEN, gentamicin; AMK, amikacin; CIP, ciprofloxacin; TET, tetracycline; CTX, cefotaxime; CST, colistin;

**Table S2** Characteristics of the *fosA3*-positive *E. coli* isolates.

| Isolate <sup>a</sup> | Source         | Farm | Isolation date | PFGE pattern | MLST   | Phylogroup | Resistance profile <sup>b</sup>                                             |
|----------------------|----------------|------|----------------|--------------|--------|------------|-----------------------------------------------------------------------------|
| SY301B               | pig feces      | Fa1  | 06/2015        | 1            | ST761  | B2         | <u>FFC</u> , <u>CTX</u> , <u>TET</u> , <u>GEN</u> , CIP                     |
| SY301F               | pig liver      | Fa2  | 06/2015        | 2            | ST3315 | B2         | <u>FFC</u> , <u>CTX</u> , <u>TET</u> , <u>GEN</u> , <u>AMK</u> , CIP        |
| SY303P               | pig liver      | Fa3  | 06/2015        | 3            | ST5714 | B2         | <u>FFC</u> , <u>CTX</u> , <u>TET</u> , <u>GEN</u> , <u>AMK</u> , CIP        |
| SY301L               | pig kidney     | Fa4  | 06/2015        | 4            | ST5442 | B2         | <u>FFC</u> , <u>CTX</u> , <u>TET</u> , <u>GEN</u> , <u>AMK</u> , <u>CIP</u> |
| SY303M               | pig liver      | Fa5  | 06/2015        | 5            | ST3944 | B2         | <u>FFC</u> , <u>CTX</u> , <u>TET</u> , <u>GEN</u> , <u>AMK</u> , CIP        |
| SY305M               | pig feces      | Fa5  | 06/2015        | 5            | ST3944 | B2         | <u>FFC</u> , <u>CTX</u> , <u>TET</u> , <u>GEN</u> , <u>AMK</u> , CIP        |
| SY286M               | cow milk       | Fa6  | 06/2015        | 6            | ST93   | B2         | <u>FFC</u> , <u>CTX</u> , <u>TET</u> , <u>GEN</u> , <u>AMK</u>              |
| SY287M               | cow milk       | Fa6  | 06/2015        | 6            | ST98   | B2         | <u>FFC</u> , <u>CTX</u> , <u>TET</u> , <u>GEN</u> , <u>AMK</u>              |
| SY284B               | cow milk       | Fa7  | 06/2015        | 7            | ST4683 | B1         | <u>FFC</u> , <u>CTX</u> , <u>TET</u> , <u>GEN</u> , <u>AMK</u>              |
| CH293B               | chicken faeces | Fa8  | 08/2015        | 8            | ST10   | B2         | <u>FFC</u> , <u>CTX</u> , <u>TET</u> , <u>GEN</u> , <u>AMK</u> , CIP        |
| CH292B               | chicken faeces | Fa8  | 08/2015        | 8            | ST10   | B2         | <u>FFC</u> , <u>CTX</u> , <u>TET</u> , <u>GEN</u> , <u>AMK</u> , CIP        |
| CH291M               | chicken faeces | Fa9  | 08/2015        | 9            | ST410  | B2         | <u>FFC</u> , <u>CTX</u> , <u>TET</u> , <u>GEN</u> , <u>AMK</u> , CIP        |
| CH281F               | chicken faeces | Fa10 | 08/2015        | 10           | ST5889 | A          | <u>FFC</u> , <u>CTX</u> , <u>TET</u> , <u>GEN</u> , <u>AMK</u> , CIP        |
| CH282M               | chicken faeces | Fa11 | 08/2015        | 11           | ST1437 | A          | <u>FFC</u> , <u>CTX</u> , <u>TET</u> , <u>GEN</u> , <u>AMK</u> , CIP        |
| CH285F               | chicken faeces | Fa12 | 08/2015        | 12           | ST448  | B2         | <u>FFC</u> , <u>CTX</u> , <u>TET</u> , <u>GEN</u> , <u>AMK</u> , CIP        |
| DH286F               | chicken faeces | Fa13 | 08/2015        | 13           | ST2518 | B2         | <u>FFC</u> , <u>CTX</u> , <u>TET</u> , <u>GEN</u> , <u>AMK</u> , CIP        |
| DH286M               | chicken faeces | Fa14 | 08/2015        | 14           | ST617  | B2         | <u>FFC</u> , <u>CTX</u> , <u>TET</u> , <u>GEN</u> , <u>AMK</u> , CIP        |
| JL12G                | cow milk       | Fa15 | 08/2015        | 15           | ST559  | B2         | <u>FFC</u> , <u>CTX</u> , <u>TET</u> , <u>GEN</u> , <u>AMK</u> , <u>CIP</u> |
| JL15P                | cow milk       | Fa16 | 08/2015        | 16           | ST209  | B2         | <u>FFC</u> , <u>CTX</u> , <u>TET</u> , <u>GEN</u> , <u>AMK</u>              |
| <u>JL17P</u>         | cow milk       | Fa16 | 08/2015        | 17           | ST359  | A          | <u>CTX</u> , <u>TET</u> , <u>GEN</u> , <u>AMK</u>                           |
| JT14G                | cow milk       | Fa17 | 08/2015        | 18           | ST5689 | B1         | <u>FFC</u> , <u>CTX</u> , <u>TET</u> , <u>GEN</u> , <u>AMK</u>              |
| JT14P                | cow milk       | Fa18 | 08/2015        | 19           | ST5714 | B1         | <u>FFC</u> , <u>CTX</u> , <u>TET</u> , <u>GEN</u> , <u>AMK</u>              |
| <u>HL12L</u>         | cow milk       | Fa19 | 11/2015        | 20           | ST195  | D          | <u>FFC</u> , <u>CTX</u> , <u>TET</u> , <u>GEN</u>                           |
| HL36B                | cow milk       | Fa20 | 11/2015        | 21a          | ST4680 | B1         | <u>FFC</u> , <u>CTX</u> , <u>TET</u> , <u>GEN</u>                           |
| HL40C                | farmer sputum  | Fa20 | 11/2015        | 21b          | ST4680 | B1         | <u>FFC</u> , <u>CTX</u> , <u>TET</u> , <u>GEN</u>                           |
| HB37B                | chicken faeces | Fa21 | 02/2016        | 22           | ST1725 | B1         | <u>FFC</u> , <u>CTX</u> , <u>TET</u> , <u>GEN</u> , <u>AMK</u> , CIP        |
| HB35D                | chicken faeces | Fa21 | 02/2016        | 23           | ST48   | B2         | <u>FFC</u> , <u>CTX</u> , <u>TET</u> , <u>GEN</u> , <u>AMK</u>              |
| HB38B                | cow milk       | Fa22 | 02/2016        | 24           | ST2055 | B1         | <u>CTX</u> , <u>TET</u> , <u>GEN</u> , <u>AMK</u> , CIP                     |
| HB38L                | cow milk       | Fa23 | 02/2016        | 25           | ST5693 | B1         | <u>FFC</u> , <u>CTX</u> , <u>TET</u> , <u>GEN</u> , <u>AMK</u> , <u>CIP</u> |
| HB18F                | cow milk       | Fa24 | 02/2016        | 26           | ST1081 | B1         | <u>FFC</u> , <u>CTX</u> , <u>TET</u> , <u>GEN</u> , <u>AMK</u> , CIP        |
| HB13B                | chicken faeces | Fa25 | 02/2016        | 27           | ST167  | B2         | <u>FFC</u> , <u>CTX</u> , <u>TET</u> , <u>GEN</u> , <u>AMK</u> , CIP        |
| HB13M                | cow milk       | Fa26 | 02/2016        | 28           | ST4463 | B2         | <u>FFC</u> , <u>CTX</u> , <u>TET</u> , <u>GEN</u> , <u>AMK</u> , CIP        |
| HB312G               | cow milk       | Fa27 | 02/2016        | 29           | ST685  | B2         | <u>FFC</u> , <u>CTX</u> , <u>TET</u> , <u>GEN</u> , <u>AMK</u> , <u>CIP</u> |
| SH312M               | pig faeces     | Fa28 | 04/2016        | 30           | ST1488 | B2         | <u>FFC</u> , <u>CTX</u> , <u>TET</u> , <u>GEN</u> , <u>AMK</u> , CIP        |
| SH312N               | pig faeces     | Fa29 | 04/2016        | 30           | ST1313 | B2         | <u>FFC</u> , <u>CTX</u> , <u>TET</u> , <u>GEN</u> , <u>AMK</u> , <u>CIP</u> |
| SH21F                | pig faeces     | Fa30 | 04/2016        | 31           | ST209  | B2         | <u>FFC</u> , <u>CTX</u> , <u>TET</u> , <u>GEN</u> , <u>CIP</u>              |
| <u>SH21G</u>         | pig faeces     | Fa31 | 04/2016        | 32           | ST354  | D          | <u>FFC</u> , <u>CTX</u> , <u>TET</u> , <u>GEN</u> , CIP                     |
| SH21M                | pig faeces     | Fa32 | 04/2016        | 33           | ST648  | D          | <u>FFC</u> , <u>CTX</u> , <u>TET</u> , <u>GEN</u> , CIP                     |
| SH33L                | cow milk       | Fa33 | 04/2016        | 29           | ST3743 | B1         | <u>FFC</u> , <u>CTX</u> , <u>TET</u> , <u>GEN</u> , CIP                     |

<sup>a</sup>The first two capital letters in each strain name represent different cities. SY, Shenyang; CH, Changchun; DL, Dehui; JL, Jilin; JT, Jiutai; HL, Hailaer; HB, Harbin; SH, Suihua; Shenyang belongs to Liaoning province; Changchun, Dehui, Jilin and Jiutai belong to Jilin Province; Hailaer belongs to Inner Mongolia autonomous region; Harbin and Suihua belong to Heilongjiang province. Isolates from healthy animals are underlined.

<sup>b</sup>AMK, amikacin; CTX, cefotaxime; CIP, ciprofloxacin; FFC, florfenicol; GEN, gentamicin; TET, tetracycline; the MIC value of florfenicol ( $\geq 32$ mg/L) was interpreted according to European Committee on Antimicrobial Susceptibility Testing (EUCAST). Transferable resistance phenotypes are underlined.

**Table S3** Primers were used to investigate the four epidemic plasmids and the genetic environment of the *fosA3* gene in other plasmids

| Plasmid       |         | Primer <sup>a</sup>   | Nucleotide sequence (5' to 3') | Product size (bp) | Annealing temperature (°C) |
|---------------|---------|-----------------------|--------------------------------|-------------------|----------------------------|
| <b>pECF12</b> | PCR 1   | repA_fw               | GTGCAGGATGGTGTGACTGA           | 4179              | 52                         |
|               |         | tnpA_rv               | AGAAAGTCGCCATGCCGTTG           |                   |                            |
|               | PCR 2   | tnpA_fw               | CTGCCAGCGTGAAGGAATAA           | 2518              | 51                         |
|               |         | fosA3_rv              | GACTATACCCACTACGCCTT           |                   |                            |
|               | PCR 3   | fosA3_fw              | TCCAGCTTATGGCCGTCAGG           | 3790              | 49                         |
|               |         | tetA_rv               | TGATCACCGGCCCTGTAGCC           |                   |                            |
|               | PCR 4   | tetA_fw               | CAAGCAGGATGTAGCCTGTG           | 3450              | 53                         |
|               |         | strA_rv               | GTGTCCC GCAATGCCGTC AA         |                   |                            |
|               | PCR 5   | strA_fw               | GCCCAGTTCTCTTCGGCGTT           | 4947              | 54                         |
|               |         | ΔTn3_rv               | CATCGACCGGCGCTACTACG           |                   |                            |
|               | PCR 6   | ΔTn3_fw               | TCCGCCATCTTG GTCAGGCC          | 4014              | 53                         |
|               | IS26_rv | G GCACTGTTGCAAATAGTCG |                                |                   |                            |
| PCR 7         | IS26_fw | TTCTTCACGTTGTTGAGGAT  | 3889                           | 50                |                            |
|               | stbA_rv | CGAACAGTATTCATTTGATC  |                                |                   |                            |
| PCR 8         | stbA_fw | ATCTATAATTAATAAAGAAT  | 4371                           | 50                |                            |
|               | ycgC_rv | TCCAGCATCACCGCCGGAAC  |                                |                   |                            |
| PCR 9         | ycgC_fw | ACGATGAGCTGGAAACCGTC  | 4660                           | 55                |                            |
|               | psiB_rv | CAGTGACGCCG CAGTGCCA  |                                |                   |                            |
| PCR 10        | psiB_fw | TGGCAGCGAGTTCGGCGGCT  | 4707                           | 55                |                            |
|               | ydcA_rv | TCTCCTGCTGGCGTGGCCCG  |                                |                   |                            |
| PCR 11        | ydcA_fw | CCATGTGTGATGCGGTGGAG  | 4211                           | 52                |                            |

|               |        |          |                       |      |    |
|---------------|--------|----------|-----------------------|------|----|
|               |        | traJ_rv  | TTGCATGACCAACACCCAGC  |      |    |
|               | PCR 12 | traJ_fw  | AGAGAGTTATATACGTCTGC  | 3489 | 50 |
|               |        | TraB_rv  | AATGTACGGCAGTGATGGTC  |      |    |
|               | PCR 13 | TraB_fw  | CGTCGCGAGCTGGATGTCCT  | 2610 | 55 |
|               |        | traV_rv  | CGCTATCCATAATGCAGCCG  |      |    |
|               | PCR 14 | traV_fw  | TCACTGCCGCGCCTGGCTGA  | 4814 | 55 |
|               |        | traU_rv  | CAGGCTGAAGCCCAGGTTCA  |      |    |
|               | PCR 15 | traU_fw  | GCAGTATCAAAGTCAGTCAG  | 4309 | 50 |
|               |        | traN_rv  | TTTATCCCGGTATGCCCAGC  |      |    |
|               | PCR 16 | traN_fw  | CTGCCAGGATCACCGGAGAC  | 3933 | 53 |
|               |        | trbF_rv  | CTCCCGGCGCATAACGGCGTT |      |    |
|               | PCR 17 | trbF_fw  | ACGGAATATTGAGTATAGTT  | 3914 | 50 |
|               |        | traG_rv  | GGCTGCGGGTCATATTCGTC  |      |    |
|               | PCR 18 | traG_fw  | CGCATAATATCAGTAATGAG  | 3711 | 50 |
|               |        | traD_rv  | GAGACAACAAAGAAGGTAAT  |      |    |
|               | PCR 19 | traD_fw  | ATATCATGCTTTACTGCCTG  | 4093 | 52 |
|               |        | tral_rv  | CACCATCCCCGGGCGGTACA  |      |    |
|               | PCR 20 | tral_fw  | GTGCGCTGATGGCCATGAAG  | 4404 | 55 |
|               |        | traX_rv  | TCACAGCGCCAGAACGCCCA  |      |    |
| <b>pECB11</b> | PCR 21 | repA_fw  | GTGACTGATCTTCAACAA    | 3950 | 49 |
|               |        | tnp_rv   | CTTTGCCACGGACATATC    |      |    |
|               | PCR 22 | tir_fw   | TTTGCCGATAAGTCCATA    | 3828 | 53 |
|               |        | ISCR2_rv | AAGCGGGTTAGGTTGA      |      |    |
|               | PCR 23 | ISCR2_fw | CTATCTGGCCTCGGATGC    | 4707 | 51 |
|               |        | tetA_rv  | GCGCTGTCGGATCGTT      |      |    |
|               | PCR 24 | tetA_fw  | AGGCAAGCAGGATGTAGC    | 3438 | 50 |

|        |                             |                      |      |    |
|--------|-----------------------------|----------------------|------|----|
|        | strA_rv                     | GTCAATCCCGACTTCT     |      |    |
| PCR 25 | strA_fw                     | TTCTCTTCGGCGTTAGCA   | 4997 | 53 |
|        | $\Delta$ Tn21_rv            | GCGCCGACCGAGTTCAT    |      |    |
| PCR 26 | $\Delta$ Tn21_fw            | GCGCTGCTGCTCGAAACT   | 4381 | 50 |
|        | res/mod_rv                  | TAACAGCGCGAAAGA      |      |    |
| PCR 27 | res/mod_fw                  | TTGCGGCGTATGTTCTC    | 3523 | 48 |
|        | res/mod_rv                  | CCATAAAGGCGAGGTAAA   |      |    |
| PCR 28 | res/mod_fw                  | TACCGTATCCTTGATT     | 4587 | 49 |
|        | exc1_rv                     | ATGGCACTGGTATCAATC   |      |    |
| PCR 29 | exc1_fw                     | TGCCGGTAGCTTGGACTC   | 3529 | 49 |
|        | fosA3_rv                    | ATAGCGGAGCCTATCTCT   |      |    |
| PCR 30 | fosA3_fw                    | TCACTGCGGTTATCTTTC   | 3353 | 50 |
|        | bla <sub>CTX-M-55</sub> _rv | GAAACGTTCCGTCTCGAC   |      |    |
| PCR 31 | bla <sub>CTX-M-55</sub> _fw | GCCGACGCTAATACATCG   | 2037 | 50 |
|        | IS26_rv                     | GGCACTGTTGCAAATAGTCG |      |    |
| PCR 32 | IS26_fw                     | CAGATACGCCAGCGGCCAT  | 4980 | 55 |
|        | met_rv                      | GTTGAGCCGCTGCCTGCAAA |      |    |
| PCR 33 | met_fw                      | GGCTGCAACCAGCCTGTAAT | 3220 | 55 |
|        | ycjA_rv                     | TGCCTGCCAGCGCCATCACT |      |    |
| PCR 34 | ycjA_fw                     | AGACGTGCCGGACAGTGAAT | 5010 | 53 |
|        | ssb_rv                      | CGGTGACGTAACGGGTAATA |      |    |
| PCR 35 | ssb_fw                      | CATGGCAGTTCGTGGCATT  | 3939 | 55 |
|        | psiA_rv                     | TCCAGGTCATGCTCTGCCAC |      |    |
| PCR 36 | psiA_fw                     | TGGCTGTATGCCGTCGATGT | 4621 | 49 |
|        | traM_rv                     | CTCTGATATCGTCAACCATA |      |    |
| PCR 37 | traM_fw                     | TCAGGAACTGCTTCAATGCT | 4526 | 50 |

|               |        |                     |                                              |      |    |
|---------------|--------|---------------------|----------------------------------------------|------|----|
|               | PCR 38 | traB_rv<br>traB_fw  | CGCTCCATTCCCTGACCGAT<br>GGTGACGTACCAGTCTGTGC | 4232 | 53 |
|               | PCR 39 | traC_rv<br>traC_fw  | CGCTGAACCACACCGGCCTC<br>CACAGTGAAGCCAACCTGAA | 4820 | 53 |
|               | PCR 40 | trbC_rv<br>trbC_fw  | GGATTCGCCCTGACCTGCTG<br>CTGACAGCAGGACTGTTTAT | 4043 | 50 |
|               | PCR 41 | traF_rv<br>traF_fw  | ATTAATGACCTGCGCCAGCT<br>AGGAGCCGGATATTATGCAG | 4544 | 50 |
|               | PCR 42 | traG_rv<br>traG_fw  | ATGCCACCAGAATGGTCTG<br>ACAGGCTGAATCTCGATACA  | 3905 | 49 |
|               | PCR 43 | hp_rv<br>hp_fw      | TAATTCCTTATGCCTGAGAG<br>TGTTGGTGAGAATAATCAAT | 4027 | 50 |
|               | PCR 44 | tral_rv<br>tral_fw  | GTTCTGGCCAGCACGTCCGT<br>TCACAGGCTATCCGAGAGGC | 3004 | 55 |
|               | PCR 45 | tral_rv<br>tral_fw  | CGCGCCGGTCCTCATTGAGG<br>GAACTGCGGGAGGCGGTATA | 3250 | 50 |
| <b>pECXH3</b> | PCR 46 | finO_rv<br>IS903_fw | TTATTTCTCATCAAGCACGG<br>TCAGGCAATACGCACGCTTT | 4178 | 53 |
|               | PCR 47 | IS26_rv<br>IS26_fw  | CACGATTTACCGCTGGGTTC<br>AGCAAGCGCGCGACCATAGG | 3860 | 53 |
|               | PCR 48 | orf2_rv<br>orf2_fw  | CCAGCGCCCTGTTTAACTAT<br>GCCATGTACCAGCACATCCC | 4583 | 54 |
|               | PCR 49 | hp_rv<br>hp_fw      | CCCAACGCTGCCCAGATGC<br>GTAGGCGCCGCCCTATACCT  | 3173 | 50 |
| <b>pECM13</b> | PCR 50 | hp_rv<br>repZ_fw    | TCAGTCAGATCCATCCGACT<br>GTGACCGGCGAGCAGAGCCT | 4699 | 52 |

|        |                        |                                               |      |    |
|--------|------------------------|-----------------------------------------------|------|----|
| PCR 51 | IS26_rv<br>IS26_fw     | TCATGGATTTAAATCCCAGC<br>CACTGTCGATTTTTATCTCT  | 4358 | 49 |
| PCR 52 | IS26_rv<br>IS26_fw     | CCTACGTGAAGGTCAATGGC<br>ATCCGTTTCAGTTTGCCATG  | 5621 | 55 |
| PCR 53 | IScfr1_rv<br>IScfr1_fw | CGTTCGCAGCGAGAGACGAG<br>CTGGTCGTCGGCTACTGCTA  | 5585 | 52 |
| PCR 54 | ISCR1_rv<br>ISCR1_fw   | TAGACGAAGTCTTCCCAAG<br>TGAGCGAGCGTATTCAGCTC   | 4705 | 53 |
| PCR 55 | IntI1_rv<br>IntI1_fw   | TGATCCGCATGCCCGTTCCA<br>ATGTCCACTGGGTTCGTGCC  | 4797 | 49 |
| PCR 56 | smc_rv<br>smc_fw       | AGTTAAGCCTGAACAATACA<br>AGGCCAGATCCATCACTCGT  | 3718 | 49 |
| PCR 57 | tir_rv<br>tir_fw       | CTCAAGCTTCTCGATTATGG<br>CAGTACCGGAAGCAGTTATT  | 4250 | 50 |
| PCR 58 | res_rv<br>res_fw       | TTATGGAATTCTTTTGAGCA<br>CACATGCTGTATGCCGGTAT  | 4195 | 50 |
| PCR 59 | umuC_rv<br>umuC_fw     | GCAGTTGAGCCCTACTCAAT<br>GCCAGCTGCAGTGCTGTGTT  | 4541 | 55 |
| PCR 60 | ychA_rv<br>ychA_fw     | TTCGTCTTCGGTCAGCCACT<br>TATCCGGGCTGGATCAGCAT  | 4241 | 55 |
| PCR 61 | parB_rv<br>parB_fw     | TGTTCCGGCAGGGTGCATATC<br>TGAGCGTGCCGCTGGCCTCA | 2958 | 55 |
| PCR 62 | psiA_rv<br>psiA_fw     | CGCCAGAGTGGTTCCTCCTG<br>TGTGGCTGGCTGCCGTGGAT  | 4552 | 55 |
| PCR 63 | tnp_rv<br>tnp_fw       | GCCTGCTTAATCTGCTCCGG<br>ACTCCCGCAGGTCATGGTGG  | 4282 | 50 |



|        |                              |                                               |      |    |
|--------|------------------------------|-----------------------------------------------|------|----|
| PCR 64 | nikB_rv<br>nikB_fw           | TGGTACTGGCGTGTAGTCAC<br>TATGACAGTGTACGCCATAC  | 4500 | 49 |
| PCR 65 | trbC_rv<br>trbC_fw           | TGATATCGATATCCGTGACA<br>GTGGCTGTTGTCTGTCCTTC  | 3320 | 52 |
| PCR 66 | trbA_rv<br>trbA_fw           | CTGTACTGGCAGATGGTGAT<br>AGCCATTGCTGTGCTTCGTT  | 4218 | 49 |
| PCR 67 | traY_rv<br>traY_fw           | GCAGGATTCTCTTTATCTAT<br>TCCTCCTAGGAAATTAATTA  | 4883 | 49 |
| PCR 68 | traU_rv<br>traU_fw           | AGGGATAACTTCAACGTTCC<br>CGAACTGAACCTAATTATT   | 3612 | 50 |
| PCR 69 | traT_rv<br>traT_fw           | ACACAATCAGTGACACACGA<br>GTACTGGTGATTTTCAGCTTT | 4250 | 49 |
| PCR 70 | traN_rv<br>traN_fw           | TCTCTGACAGTTAATCTGTC<br>CCACTGGTTACGTTTCAGGAT | 3655 | 52 |
| PCR 71 | SogL/SogS_rv<br>SogL/SogS_fw | GATGACAAACAAAGCACCCGG<br>AGGTATCGGTGGAGTCGTCG | 4747 | 55 |
| PCR 72 | tral_rv<br>tral_fw           | CCATCATTCGCCCTGAACGC<br>TTGGCTTCAAGCGTCAGGTC  | 3925 | 50 |
| PCR 73 | traE_rv<br>traE_fw           | TACATCATGCTGTCGCATGA<br>TCAATATTACCCCGCAATAT  | 4645 | 50 |
| PCR 74 | pilV_rv<br>pilV_fw           | TTACAGGCATATGTGGTTTCG<br>ACGTTATTCAGGTTATTTGA | 4180 | 49 |
| PCR 75 | pilQ_rv<br>pilQ_fw           | CATTACATACAAACCTCAGCT<br>CCTGCCGGTGAGGCCTTTAC | 4766 | 50 |
| PCR 76 | pilN_rv<br>pilN_fw           | CACCACCGGATTCAATATGA<br>ATAATGGATTTGCTGGCGTA  | 2920 | 52 |

|        |         |                      |      |    |
|--------|---------|----------------------|------|----|
|        | piIL_rv | AGAGTCAGCGTGCCAGAGAC |      |    |
| PCR 77 | piIL_fw | GGCTGCATTCTTGTCTGA   | 3368 | 50 |
|        | traC_rv | ATGACCACGACAGAACATCC |      |    |

---

<sup>a</sup>PCR1 to PCR20 were designed per the complete sequence of pECF12 and PCR2 to PCR6 were used to investigate the type I structure of *fosA3* environment; PCR21 to PCR45 were designed per the complete sequence of pECB11 and PCR22 to PCR31 were used to investigate the type II structure of *fosA3* environment; PCR46 to PCR49 were designed per the sequence of pECXH3, and which were used to investigate the type III structure of *fosA3* environment; PCR50 to PCR77 were designed per the complete sequence of pECM13 and PCR50 to PCR55 were used to investigate the type IV structure of *fosA3* environment.

Table S4. Annotation of ORFs in plasmid pECF12

| Gene name                      | location (start-end) | size (aa <sup>a</sup> ) | aa identity (%) | Alignment region of the match | homolog description                                                        |
|--------------------------------|----------------------|-------------------------|-----------------|-------------------------------|----------------------------------------------------------------------------|
| <i>repA1</i>                   | 1-870                | 290                     | 100             | 1-290/290                     | plasmid replication protein RepA [ <i>Escherichia coli</i> 7A8]            |
| <i>tir</i>                     | 1809-2462            | 217                     | 100             | 1-217/217                     | transfer inhibition protein [ <i>Escherichia coli</i> ]                    |
| <i>pemI</i>                    | 2555-2812            | 85                      | 100             | 1-85/85                       | stable plasmid inheritance [ <i>Escherichia coli</i> ]                     |
| <i>pemK</i>                    | 2736-3146            | 136                     | 100             | 1-136/136                     | stable inheritance protein PemK [ <i>Escherichia coli</i> UMNK88]          |
| $\Delta$ <i>tnpA</i>           | 4409-3846            | 177                     | 100             | 1-177:14-190/177 <sup>b</sup> | Tn3 transposase, tnpA [ <i>Escherichia coli</i> ]                          |
| <i>fosA3</i>                   | 6617-6201            | 138                     | 100             | 1-138/138                     | Fosfomycin resistance protein FosA3 [ <i>Escherichia coli</i> ]            |
| IS26                           | 6991-7707            | 238                     | 100             | 1-238/238                     | Tnp1 superfamily, IS26 transposase [ <i>Escherichia coli</i> ]             |
| <i>res</i>                     | 8339-9076            | 245                     | 100             | 1-245/245                     | Ser-recombinase, resolvase [ <i>Escherichia coli</i> 75]                   |
| <i>tetA</i>                    | 10937-9663           | 424                     | 100             | 1-424/424                     | tetracycline efflux protein TetA [ <i>Escherichia coli</i> UMNK88]         |
| <i>tetR</i>                    | 10941-11618          | 225                     | 100             | 1-225/225                     | tetracycline resistance repressor protein TetR [ <i>Escherichia coli</i> ] |
| <i>strB</i>                    | 13034-12198          | 278                     | 100             | 1-278/278                     | streptomycin phosphotransferase, StrB [ <i>Escherichia coli</i> W26]       |
| <i>strA</i>                    | 13525-13034          | 163                     | 100             | 1-163/163                     | streptomycin phosphotransferase, StrA [ <i>Escherichia coli</i> ]          |
| $\Delta$ <i>sul2</i>           | 14713-13898          | 271                     | 100             | 1-271:13-283/271              | dihydropteroate synthase type-2 [ <i>Escherichia coli</i> UMEA 3215-1]     |
| IS5075                         | 16405-15401          | 334                     | 100             | 1-334/334                     | IS5075 transposase [ <i>Escherichia coli</i> SMS-3-5]                      |
| $\Delta$ Tn3                   | 18190-16484          | 568                     | 100             | 1-568/568                     | Tn3 family transposase [ <i>Escherichia coli</i> SMS-3-5]                  |
| IS26                           | 19018-18302          | 238                     | 100             | 1-238/238                     | transposase of IS26 [ <i>Escherichia coli</i> ]                            |
| <i>bla</i> <sub>CTX-M-55</sub> | 20392-19517          | 291                     | 100             | 1-291/291                     | Beta-lactamase CTX-M-55 [ <i>Escherichia coli</i> ]                        |
| IS26                           | 21530-20814          | 238                     | 100             | 1-238/238                     | Tnp1 superfamily IS26, transposase of IS26 [ <i>Escherichia coli</i> ]     |
| <i>stbA</i>                    | 25179-24217          | 320                     | 100             | 1-320/320                     | stable plasmid inheritance protein A, stbA [ <i>Escherichia coli</i> ]     |
| <i>ycgA</i>                    | 25696-26379          | 227                     | 100             | 1-227/227                     | DNA methylase family protein, YcgA [ <i>Escherichia coli</i> ]             |
| <i>ycgB</i>                    | 26615-27049          | 144                     | 100             | 1-144/144                     | transcription-repair coupling factor, YcgB [ <i>Escherichia coli</i> ]     |
| <i>yciA</i>                    | 27734-28321          | 195                     | 100             | 1-195/195                     | YciA [ <i>Escherichia coli</i> ]                                           |
| <i>ycgC</i>                    | 28766-29188          | 140                     | 100             | 1-140/140                     | <i>ycgC</i> [ <i>Escherichia coli</i> DEC8C]                               |
| <i>ssb</i>                     | 30177-30743          | 188                     | 100             | 1-188/188                     | single-strand binding protein, Ssb [ <i>Escherichia coli</i> ]             |
| <i>parB</i>                    | 31095-32516          | 473                     | 100             | 1-473/473                     | parB, ParB-like partition protein [ <i>Escherichia coli</i> ]              |
| <i>psiB</i>                    | 33187-33621          | 144                     | 100             | 1-144/144                     | plasmid SOS inhibition protein B [ <i>Escherichia coli</i> ]               |
| <i>psiA</i>                    | 33618-34337          | 239                     | 100             | 1-239/239                     | plasmid SOS inhibition protein PsiA [ <i>Escherichia coli</i> F18+]        |

|             |             |      |     |             |                                                                              |
|-------------|-------------|------|-----|-------------|------------------------------------------------------------------------------|
| <i>ydbA</i> | 36172-37533 | 453  | 100 | 1-453/453   | YdbA [ <i>Escherichia coli</i> ]                                             |
| <i>ydcA</i> | 37580-38143 | 187  | 100 | 1-187/187   | YdcA, DNA-methyltransferase-like protein [ <i>Escherichia coli</i> ]         |
| <i>yubP</i> | 38887-39708 | 273  | 100 | 1-273/273   | YubP [ <i>Escherichia coli</i> ]                                             |
| <i>ygfA</i> | 40005-40652 | 215  | 100 | 1-215/215   | lytic transglycosylase YgfA [ <i>Escherichia coli</i> ]                      |
| <i>traM</i> | 40929-41312 | 127  | 100 | 1-127/127   | type IV conjugative transfer protein TraM [ <i>Escherichia coli</i> ]        |
| <i>traJ</i> | 41443-42189 | 248  | 98  | 1-248/248   | conjugal transfer protein TraJ [ <i>Escherichia coli</i> LAU-EC10]           |
| <i>traA</i> | 42544-42909 | 121  | 99  | 1-121/121   | conjugal transfer protein TraA [ <i>Escherichia coli</i> O26:H11]            |
| <i>traE</i> | 43257-43823 | 188  | 100 | 1-188/188   | type IV conjugative transfer system protein TraE [ <i>Escherichia coli</i> ] |
| <i>traK</i> | 43810-44538 | 242  | 100 | 1-242/242   | type IV conjugative transfer secretin TraK [ <i>Escherichia coli</i> ]       |
| <i>traB</i> | 44538-45965 | 475  | 100 | 1-475/475   | type IV conjugative transfer system protein TraB [ <i>Escherichia coli</i> ] |
| <i>traP</i> | 45955-46545 | 196  | 100 | 1-196/196   | type IV conjugative transfer system protein TraP [ <i>Escherichia coli</i> ] |
| <i>traV</i> | 46989-47504 | 171  | 100 | 1-171/171   | type IV conjugative transfer system TraV [ <i>Escherichia coli</i> ]         |
| <i>traW</i> | 51027-51659 | 210  | 100 | 1-210/210   | type IV conjugative transfer system TraW [ <i>Escherichia coli</i> ]         |
| <i>traU</i> | 51656-52648 | 330  | 100 | 1-330/330   | conjugal transfer pilus assembly protein TraU [ <i>Escherichia coli</i> ]    |
| <i>trbC</i> | 53594-54232 | 212  | 100 | 1-212/212   | type IV conjugative transfer system TrbC [ <i>Escherichia coli</i> ]         |
| <i>traN</i> | 55045-56895 | 616  | 100 | 1-616/616   | conjugative transfer protein TraN [ <i>Escherichia coli</i> ]                |
| <i>traF</i> | 57142-57915 | 257  | 100 | 1-257/257   | conjugative transfer pilus assembly protein TraF [ <i>Escherichia coli</i> ] |
| <i>trbB</i> | 58299-58844 | 181  | 100 | 1-181/181   | Putative conjugative transfer protein TrbB [ <i>Escherichia coli</i> ]       |
| <i>trbF</i> | 59102-59494 | 130  | 100 | 1-130/130   | probable conjugal transfer protein TrbF [ <i>Escherichia coli</i> ]          |
| <i>traH</i> | 59481-60854 | 457  | 100 | 1-457/457   | type IV conjugative transfer system pilus TraH [ <i>Escherichia coli</i> ]   |
| <i>traG</i> | 60851-63667 | 938  | 100 | 1-938/938   | type IV conjugative transfer system TraG [ <i>Escherichia coli</i> ]         |
| <i>traT</i> | 64243-64977 | 244  | 100 | 1-244/244   | type IV conjugative transfer system TraT [ <i>Escherichia coli</i> ]         |
| <i>traD</i> | 65968-68175 | 735  | 100 | 1-735/735   | conjugal transfer protein TraD [ <i>Escherichia coli</i> ]                   |
| <i>tral</i> | 68175-73445 | 1756 | 99  | 1-1756/1756 | type IV conjugative transfer relaxase protein [ <i>Escherichia coli</i> ]    |
| <i>traX</i> | 73465-74211 | 248  | 100 | 248/248     | type IV conjugative transfer pilin acetylase [ <i>Escherichia coli</i> ]     |

<sup>a</sup>aa, amino acids.

<sup>b</sup>Query alignment region:match alignment region/total aa of the match.

Table S5. Annotation of ORFs in plasmid pECB11

| Gene designation            | location (start-end) | size (aa <sup>a</sup> ) | aa identity (%) | Alignment region of the match | homologue description                                                       |
|-----------------------------|----------------------|-------------------------|-----------------|-------------------------------|-----------------------------------------------------------------------------|
| <i>repA1</i>                | 1-858                | 285                     | 100             | 1-285/285                     | plasmid replication initiator RepA [ <i>Escherichia coli</i> ]              |
| <i>repA4</i>                | 1221-1607            | 128                     | 100             | 1-128/128                     | replication initiation protein RepA4 [ <i>Escherichia coli</i> ]            |
| <i>tir</i>                  | 1797-2450            | 217                     | 100             | 1-217/217                     | CAAX amino terminal protease Tir protein [ <i>Escherichia coli</i> ]        |
| <i>tnp</i>                  | 4367-3834            | 177                     | 100             | 1-177/177                     | Tn3 transposase [ <i>Escherichia coli</i> ]                                 |
| IS26                        | 4445-5161            | 238                     | 100             | 1-238/238                     | transposase tnpAIS26 [ <i>Escherichia coli</i> ]                            |
| ISCR2                       | 5374-6297            | 307                     | 100             | 1-307/307                     | putative transposase of ISCR2 [ <i>Escherichia coli</i> EC1865]             |
| <i>virD2</i>                | 6328-7212            | 294                     | 100             | 1-294/294                     | type IV secretory pathway protein VirD2 [ <i>Escherichia coli</i> ]         |
| <i>floR</i>                 | 7429-8643            | 404                     | 100             | 1-404/404                     | florfenicol-chloramphenicol exporter FloR [ <i>Escherichia coli</i> ]       |
| <i>lysR</i>                 | 8671-8976            | 101                     | 100             | 1-101/101                     | putative transcriptional regulator protein LysR [ <i>Escherichia coli</i> ] |
| <i>tetA</i>                 | 10517-9243           | 424                     | 100             | 1-424/424                     | tetracycline repressor protein TetA class A [ <i>Escherichia coli</i> ]     |
| <i>tetR</i>                 | 10521-11198          | 225                     | 100             | 1-225/225                     | tetracycline repressor protein TetR [ <i>Escherichia coli</i> ]             |
| <i>strB</i>                 | 12614-11778          | 278                     | 100             | 1-278/278                     | aminoglycoside resistance protein StrB [ <i>Escherichia coli</i> ]          |
| <i>strA</i>                 | 13105-12614          | 163                     | 100             | 1-163/163                     | streptomycin phosphotransferase, StrA [ <i>Escherichia coli</i> ]           |
| $\Delta$ <i>sul2</i>        | 14293-13478          | 271                     | 100             | 1-271:13-283/271 <sup>b</sup> | dihydropteroate synthase type-2 [ <i>Escherichia coli</i> UMEA ]            |
| IS5075                      | 15985-14981          | 334                     | 100             | 1-334/334                     | Transposase, similar to IS5075 [ <i>Escherichia coli</i> ]                  |
| $\Delta$ <i>tnp</i>         | 17770-16064          | 568                     | 100             | 1-568:421-988/568             | transposase for transposon Tn21 [ <i>Escherichia coli</i> BIDMC 19A]        |
| <i>mobA</i>                 | 18113-18850          | 245                     | 100             | 1-245/245                     | relaxation protein MobA [ <i>Escherichia coli</i> ]                         |
| <i>rel</i>                  | 18863-19447          | 194                     | 100             | 1-194/194                     | relaxation protein [ <i>Escherichia coli</i> ]                              |
| <i>res/mod</i>              | 22126-19490          | 878                     | 100             | 1-878/878                     | type III restriction and modification system [ <i>Escherichia coli</i> ]    |
| <i>res/mod</i>              | 24179-22131          | 682                     | 100             | 1-682/682                     | type III restriction/modification enzyme [ <i>Escherichia coli</i> ]        |
| <i>exc1</i>                 | 27775-27326          | 149                     | 100             | 1-149/149                     | Putative entry exclusion protein 1 (Exc1) [ <i>Escherichia coli</i> ]       |
| IS26                        | 28074-28790          | 238                     | 100             | 1-238/238                     | transposase tnpAIS26 [ <i>Escherichia coli</i> ]                            |
| <i>orf2</i>                 | 29290-30078          | 262                     | 100             | 1-262/262                     | CadC-like protein, transcriptional regulator [ <i>Escherichia coli</i> ]    |
| <i>fosA3</i>                | 31017-30601          | 138                     | 100             | 1-138/138                     | fosfomycin resistance protein FosA3 (plasmid) [ <i>Escherichia coli</i> ]   |
| IS26                        | 31391-32107          | 238                     | 100             | 1-238/238                     | transposase tnpAIS26 [ <i>Escherichia coli</i> ]                            |
| <i>bla</i> <sub>TEM-1</sub> | 32235-32900          | 221                     | 100             | 1-221/221                     | beta-lactamase protein TEM-1b [ <i>Escherichia coli</i> UMN18]              |

|                                |             |     |     |                  |                                                                            |
|--------------------------------|-------------|-----|-----|------------------|----------------------------------------------------------------------------|
| <i>orf477</i>                  | 33159-33635 | 158 | 100 | 1-158/158        | ORF477 [ <i>Escherichia coli</i> ]                                         |
| <i>bla</i> <sub>CTX-M-55</sub> | 34557-33682 | 291 | 100 | 1-291/291        | extended-spectrum beta-lactamase CTX-M-55 [ <i>Escherichia coli</i> ]      |
| <i>IS26</i>                    | 34979-35695 | 238 | 100 | 1-238/238        | transposase tnpAIS26 [ <i>Escherichia coli</i> ]                           |
| <i>stbB</i>                    | 38382-38029 | 117 | 100 | 1-117/117        | stable plasmid inheritance protein B [ <i>Escherichia coli</i> ]           |
| <i>stbA</i>                    | 39344-38382 | 320 | 100 | 1-320/320        | stable plasmid inheritance protein A (plasmid) [ <i>Escherichia coli</i> ] |
| <i>met</i>                     | 39861-40544 | 227 | 100 | 1-227/227        | DNA methylase family protein [ <i>Escherichia coli</i> ]                   |
| <i>ycgB</i>                    | 40780-41214 | 144 | 100 | 1-144/144        | transcription-repair coupling factor, YcgB [ <i>Escherichia coli</i> ]     |
| <i>ycaA</i>                    | 41214-42041 | 275 | 100 | 1-275/275        | YcaA (plasmid) [ <i>Escherichia coli</i> ]                                 |
| <i>yciA</i>                    | 41914-42486 | 190 | 100 | 1-190/190        | YciA [ <i>Escherichia coli</i> ]                                           |
| <i>klcA</i>                    | 42459-42884 | 141 | 100 | 1-141/141        | anti-restriction protein klcA [ <i>Escherichia coli</i> ]                  |
| <i>ycjA</i>                    | 42931-43353 | 140 | 100 | 1-140/140        | YcjA (plasmid) [ <i>Escherichia coli</i> ]                                 |
| <i>ydbA</i>                    | 44861-46222 | 453 | 100 | 1-453/453        | YdbA (plasmid) [ <i>Escherichia coli</i> ]                                 |
| <i>ydcA</i>                    | 46269-46832 | 187 | 100 | 1-187/187        | YdcA [ <i>Escherichia coli</i> ]                                           |
| <i>ssb</i>                     | 47648-48214 | 188 | 100 | 1-188/188        | single-strand binding protein, Ssb [ <i>Escherichia coli</i> ]             |
| <i>YefA</i>                    | 50128-50589 | 153 | 100 | 1-153:39-191/153 | YefA (plasmid) [ <i>Escherichia coli</i> ]                                 |
| <i>psiB</i>                    | 50658-51092 | 144 | 100 | 1-144/144        | plasmid SOS inhibition protein B [ <i>Escherichia coli</i> ]               |
| <i>psiA</i>                    | 51089-51808 | 239 | 100 | 1-239/239        | plasmid SOS inhibition protein A [ <i>Escherichia coli</i> ]               |
| <i>yubP</i>                    | 53568-54389 | 273 | 100 | 1-172/273        | yubP protein [ <i>Escherichia coli</i> FVEC1302]                           |
| <i>ygfA</i>                    | 55333-54686 | 215 | 100 | 1-215/215        | lytic transglycosylase YgfA [ <i>Escherichia coli</i> ]                    |
| <i>traM</i>                    | 55610-55993 | 127 | 100 | 1-127/127        | conjugal transfer protein TraM [ <i>Escherichia coli</i> ]                 |
| <i>traJ</i>                    | 56124-56870 | 248 | 100 | 1-248/248        | conjugal transfer protein TraJ [ <i>Escherichia coli</i> ]                 |
| <i>traA</i>                    | 57225-57590 | 121 | 100 | 1-121/121        | conjugal transfer protein TraA [ <i>Escherichia coli</i> ]                 |
| <i>traL</i>                    | 57605-57916 | 103 | 100 | 1-103/103        | conjugal transfer pilus assembly protein TraL [ <i>Escherichia coli</i> ]  |
| <i>traE</i>                    | 57938-58504 | 188 | 100 | 1-188/188        | conjugal transfer protein TraE [ <i>Escherichia coli</i> ]                 |
| <i>traK</i>                    | 58491-59219 | 242 | 100 | 1-242/242        | conjugal transfer protein TraK [ <i>Escherichia coli</i> ]                 |
| <i>traB</i>                    | 59219-60646 | 475 | 100 | 1-475/475        | conjugal transfer protein TraB [ <i>Escherichia coli</i> ]                 |
| <i>traP</i>                    | 60636-61226 | 196 | 100 | 1-196/196        | conjugal transfer protein TraP [ <i>Escherichia coli</i> ]                 |
| <i>ΔtraV</i>                   | 61778-62185 | 135 | 100 | 1-135:37-171/135 | conjugal transfer protein TraV [ <i>Escherichia coli</i> ]                 |
| <i>traC</i>                    | 62803-65328 | 841 | 100 | 1-841/841        | conjugal transfer protein TraC [ <i>Escherichia coli</i> ]                 |

|              |             |      |     |             |                                                                                 |
|--------------|-------------|------|-----|-------------|---------------------------------------------------------------------------------|
| <i>trbI</i>  | 65325-65711 | 128  | 100 | 1-128/128   | conjugal transfer protein TrbI (plasmid) [ <i>Escherichia coli</i> ]            |
| <i>traW</i>  | 65708-66340 | 210  | 100 | 1-210/210   | conjugal transfer pilus assembly protein TraW [ <i>Escherichia coli</i> ]       |
| <i>traU</i>  | 66337-67329 | 330  | 100 | 1-330/330   | F pilin assembly, TraU [ <i>Escherichia coli</i> ]                              |
| <i>ygeA</i>  | 67356-67664 | 102  | 100 | 1-102/102   | ygeA protein [ <i>Escherichia coli</i> DEC8D]                                   |
| <i>trbC</i>  | 68275-68913 | 212  | 100 | 1-212/212   | conjugal transfer protein TrbC (plasmid) [ <i>Escherichia coli</i> ]            |
| HNH          | 69307-69729 | 140  | 100 | 1-140/140   | HNH endonuclease family protein [ <i>Escherichia coli</i> DEC1B]                |
| <i>traN</i>  | 69726-71576 | 616  | 100 | 1-616/616   | conjugal transfer protein TraN [ <i>Escherichia coli</i> ]                      |
| <i>traF</i>  | 71823-72596 | 257  | 100 | 1-257/257   | conjugal transfer pilus assembly protein TraF [ <i>Escherichia coli</i> ]       |
| <i>trbB</i>  | 72980-73525 | 181  | 100 | 1-181/181   | conjugal transfer protein TrbB [ <i>Escherichia coli</i> ]                      |
| <i>trbF</i>  | 73783-74175 | 130  | 100 | 1-130/130   | putative conjugal transfer protein TrbF [ <i>Escherichia coli</i> ]             |
| <i>traH</i>  | 74162-75535 | 457  | 100 | 1-457/457   | conjugal transfer pilus assembly protein TraH [ <i>Escherichia coli</i> ]       |
| <i>traG</i>  | 75601-78348 | 915  | 100 | 1-915/915   | conjugal transfer protein TraG, partial [ <i>Escherichia coli</i> ]             |
| <i>traS</i>  | 78381-78902 | 173  | 100 | 1-173/173   | conjugal transfer entry exclusion protein TraS [ <i>Escherichia coli</i> ]      |
| <i>traT</i>  | 78924-79658 | 244  | 100 | 1-244/244   | conjugal transfer protein TraT [ <i>Escherichia coli</i> ]                      |
| <i>hp</i>    | 79861-80598 | 245  | 100 | 1-245/245   | transmembrane protein (plasmid) [ <i>Escherichia coli</i> ]                     |
| <i>ΔtraD</i> | 80649-82157 | 502  | 100 | 1-500/500   | conjugal transfer protein TraD [ <i>Escherichia coli</i> ]                      |
| <i>tral</i>  | 82886-88156 | 1756 | 100 | 1-1756/1756 | conjugal transfer protein Tral [ <i>Escherichia coli</i> ]                      |
| <i>traX</i>  | 88176-88922 | 248  | 100 | 1-248/248   | conjugal transfer protein, TraX [ <i>Escherichia coli</i> ]                     |
| <i>finO</i>  | 88977-89537 | 186  | 100 | 1-186/186   | conjugal transfer fertility inhibition protein FinO [ <i>Escherichia coli</i> ] |

<sup>a</sup>aa, amino acids.

<sup>b</sup>Query alignment region:match alignment region/total aa of the match.

Table S6. Annotation of ORFs in plasmid pECXH3

| Gene designation               | location (start-end) | size (aa <sup>a</sup> ) | aa identity (%) | Alignment region of the match | homologue description                                                |
|--------------------------------|----------------------|-------------------------|-----------------|-------------------------------|----------------------------------------------------------------------|
| IS903                          | 1309-386             | 307                     | 99              | 1-307/307                     | IS903 transposase (plasmid) [ <i>Escherichia coli</i> ]              |
| <i>bla</i> <sub>CTX-M-65</sub> | 2264-1389            | 291                     | 100             | 1-291/291                     | CTX-M-65 beta-lactamase [ <i>Escherichia coli</i> ]                  |
| <i>fipA</i>                    | 3395-2769            | 208                     | 100             | 1-208/208                     | fipA [Plasmid pKM101]                                                |
| IS26                           | 4709-3993            | 238                     | 100             | 1-238/238                     | IS26 transposase, (plasmid) [ <i>Escherichia coli</i> ]              |
| IS26                           | 6112-5396            | 238                     | 100             | 1-238/238                     | IS26 transposase, (plasmid) [ <i>Escherichia coli</i> ]              |
| <i>fosA3</i>                   | 6486-6902            | 138                     | 100             | 1-138/138                     | fosfomycin resistance protein FosA3 [ <i>Escherichia coli</i> ]      |
| <i>hp</i>                      | 7114-7443            | 109                     | 100             | 1-109/109                     | hypothetical protein A6V31_17905 [ <i>Proteus mirabilis</i> ]        |
| <i>orf1</i>                    | 7425-6907            | 172                     | 100             | 1-172/172                     | Orf1 (plasmid) [ <i>Escherichia coli</i> ]                           |
| <i>orf2</i>                    | 8213-7425            | 262                     | 100             | 1-262/262                     | Orf2 (plasmid) [ <i>Escherichia coli</i> ]                           |
| IS26                           | 9429-8713            | 238                     | 100             | 1-238/238                     | IS26 transposase, (plasmid) [ <i>Escherichia coli</i> ]              |
| <i>tetR</i>                    | 10909-10250          | 219                     | 99              | 1-219/219                     | tetracycline repressor protein TetR [ <i>Escherichia coli</i> SE11]  |
| <i>tet(A)</i>                  | 11002-12192          | 396                     | 100             | 1-396/396                     | Tetracycline efflux protein TetA [ <i>Proteus mirabilis</i> ]        |
| <i>hp</i>                      | 12096-12434          | 112                     | 100             | 1-112/112                     | conserved hypothetical protein (plasmid) [ <i>Escherichia coli</i> ] |
| <i>orf</i>                     | 13184-12717          | 155                     | 100             | 1-155/155                     | orf [ <i>Escherichia coli</i> ]                                      |
| <i>merR</i>                    | 13782-13375          | 135                     | 100             | 1-135/135                     | MerR family transcriptional regulator [ <i>Proteus mirabilis</i> ]   |
| <i>hp</i>                      | 13878-14774          | 298                     | 100             | 1-298/298                     | sodium: proton antiporter [Gammaproteobacteria]                      |
| <i>hp</i>                      | 14778-15290          | 170                     | 100             | 1-170/170                     | lipoprotein signal peptidase [ <i>Escherichia coli</i> ]             |

<sup>a</sup>aa, amino acids.



Table S7. Annotation of ORFs in plasmid pECM13

| Gene designation               | location (start-end) | size (aa <sup>a</sup> ) | aa identity (%) | Alignment region of the match | homologue description                                                  |
|--------------------------------|----------------------|-------------------------|-----------------|-------------------------------|------------------------------------------------------------------------|
| <i>repZ</i>                    | 1-765                | 255                     | 100             | 1-255/255                     | IncFII RepA protein [ <i>Escherichia coli</i> 2.3916]                  |
| <i>rep</i>                     | 900-307              | 197                     | 99              | 1-197/197                     | replication initiation protein (plasmid) [ <i>Escherichia coli</i> ]   |
| IS26                           | 4111-4827            | 238                     | 100             | 1-238/238                     | transposase of IS26, IS6 family [ <i>Escherichia coli</i> ]            |
| <i>bla</i> <sub>CTX-M-14</sub> | 5130-6005            | 291                     | 100             | 1-291/291                     | extended-spectrum beta-lactamase CTX-M-14 [ <i>Escherichia coli</i> ]  |
| <i>fosA3</i>                   | 6617-7033            | 139                     | 100             | 1-139/139                     | Fosfomycin resistance protein FosA3 [ <i>Escherichia coli</i> ]        |
| IS26                           | 9029-8313            | 238                     | 100             | 1-238/238                     | transposase of IS26, IS6 family [ <i>Escherichia coli</i> ]            |
| <i>aac(3)-IId</i>              | 9250-10110           | 286                     | 100             | 1-286/286                     | aminoglycoside 3-N-acetyltransferase [ <i>Escherichia coli</i> ]       |
| <i>tmrB</i>                    | 10123-10665          | 180                     | 100             | 1-180/180                     | Tunicamycin resistance protein [ <i>Escherichia coli</i> ]             |
| ISCfr1                         | 12892-14262          | 456                     | 100             | 1-456/456                     | ISCfr1, TnpA [ <i>Escherichia coli</i> ]                               |
| <i>bla</i> <sub>TEM-1</sub>    | 15083-15943          | 286                     | 100             | 1-286/286                     | TEM-1 beta-lactamase [ <i>Escherichia coli</i> ]                       |
| <i>rmtB</i>                    | 16113-16868          | 251                     | 100             | 1-251/251                     | 16S rRNA methylase RmtB [ <i>Escherichia coli</i> ]                    |
| ISCR1                          | 19002-17461          | 513                     | 100             | 1-513/513                     | ISCR1 transposase [ <i>Escherichia coli</i> ]                          |
| <i>sul1</i>                    | 20333-19407          | 279                     | 100             | 1-279/279                     | dihydropteroate synthase, sul1 [ <i>Escherichia coli</i> ]             |
| <i>qacEdelta1</i>              | 20587-20240          | 115                     | 100             | 1-115/115                     | quarternary ammonium compounds [ <i>Escherichia coli</i> ]             |
| <i>aadA2</i>                   | 21542-20751          | 263                     | 100             | 1-263:10-272/263 <sup>b</sup> | aminoglycoside nucleotidyltransferase [ <i>Klebsiella pneumoniae</i> ] |
| <i>intI1</i>                   | 22592-23605          | 337                     | 100             | 1-337/337                     | IntI1 integrase [ <i>Escherichia coli</i> ]                            |
| IS26                           | 24598-23882          | 238                     | 100             | 1-238/238                     | transposase of IS26, IS6 family [ <i>Escherichia coli</i> ]            |
| <i>chem</i>                    | 24577-25965          | 462                     | 99              | 16-462/447                    | chemotaxis protein [Enterobacter hormaechei subsp. oharae]             |
| <i>smc</i>                     | 28744-27188          | 518                     | 100             | 1-518/518                     | recF/RecN/SMC N terminal domain protein [ <i>Escherichia coli</i> ]    |
| <i>tir</i>                     | 30185-31288          | 367                     | 100             | 1-367/367                     | nucleotide-binding containing TIR-like [ <i>Escherichia coli</i> ]     |
| <i>res</i>                     | 33953-34732          | 259                     | 100             | 1-259/259                     | resolvase [ <i>Escherichia coli</i> KTE191]                            |
| <i>yefA</i>                    | 34879-35556          | 225                     | 100             | 1-225/225                     | ParB-like nuclease YefA [ <i>Escherichia coli</i> ]                    |
| <i>stbA</i>                    | 36310-37344          | 344                     | 100             | 1-344/344                     | plasmid partitioning and stability StbA [ <i>Escherichia coli</i> ]    |
| <i>umuC</i>                    | 39029-37755          | 424                     | 100             | 1-424/424                     | UV protection protein UmuC [ <i>Escherichia coli</i> ]                 |
| <i>yubD</i>                    | 41199-41882          | 227                     | 100             | 1-227/227                     | putative DNA methylase YubD [ <i>Escherichia coli</i> ACN001]          |
| <i>ycaA</i>                    | 42552-43379          | 275                     | 100             | 1-275/275                     | YcaA [ <i>Escherichia coli</i> ]                                       |
| <i>parB</i>                    | 46437-48485          | 682                     | 100             | 1-682                         | ParB-like partition protein [ <i>Escherichia coli</i> KTE191]          |

|                  |               |      |     |                  |                                                                       |
|------------------|---------------|------|-----|------------------|-----------------------------------------------------------------------|
| <i>psiA</i>      | 48971-49690   | 239  | 100 | 1-239/239        | plasmid SOS inhibition protein A, PsiA [ <i>Escherichia coli</i> ]    |
| <i>ardA</i>      | 50512-51246   | 244  | 100 | 1-244/244        | antirestriction protein ArdA [ <i>Escherichia coli</i> ]              |
| <i>tnp</i>       | 52832-53794   | 320  | 100 | 1-320/320        | transposase [ <i>Escherichia coli</i> ]                               |
| <i>ydiA</i>      | 54901-55749   | 282  | 100 | 1-282/282        | YdiA protein [ <i>Escherichia coli</i> ACN001]                        |
| <i>nikB</i>      | 56831-59449   | 872  | 100 | 1-872/872        | relaxase NikB [ <i>Escherichia coli</i> ]                             |
| <i>trbC</i>      | 62754-60463   | 763  | 100 | 1-763/763        | conjugal transfer protein TrbC [ <i>Escherichia coli</i> EC4402]      |
| <i>trbB</i>      | 63817-62747   | 356  | 100 | 1-356/356        | TrbB protein [ <i>Escherichia coli</i> ACN001]                        |
| <i>trbA</i>      | 65044-63836   | 402  | 100 | 1-402            | conjugal protein TrbA [ <i>Escherichia coli</i> ACN001]               |
| <i>traY</i>      | 70091-67854   | 745  | 100 | 1-745/745        | Incl1 conjugal transfer protein TraY [ <i>Escherichia coli</i> ]      |
| <i>traW</i>      | 71934-70732   | 400  | 100 | 1-400/400        | conjugal transfer protein, TraW [ <i>Escherichia coli</i> KO11FL]     |
| <i>traU</i>      | 75559-72515   | 1014 | 100 | 1-1014/1014      | conjugal protein TraU [ <i>Escherichia coli</i> W26]                  |
| <i>traT</i>      | 76449-75649   | 266  | 100 | 1-266/266        | conjugal transfer protein TraT [ <i>Escherichia coli</i> ]            |
| <i>traP</i>      | 78371-77667   | 234  | 100 | 1-234/234        | conjugal transfer protein TraP [ <i>Escherichia coli</i> ]            |
| <i>traO</i>      | 79660-78371   | 429  | 100 | 1-429/429        | conjugal transfer protein TraO [ <i>Salmonella enterica</i> subsp]    |
| <i>traN</i>      | 80646-79663   | 327  | 100 | 1-327/327        | conjugal transfer protein TraN (plasmid) [ <i>Escherichia coli</i> ]  |
| <i>traM</i>      | 81349-80657   | 230  | 100 | 1-230/230        | conjugal transfer protein TraM [ <i>Escherichia coli</i> ]            |
| <i>SogL/SogS</i> | 85478-81711   | 1255 | 100 | 1-1255/1255      | SogL/SogS DNA primase [ <i>Escherichia coli</i> ]                     |
| <i>traK</i>      | 86479-85568   | 303  | 100 | 1-303/303        | conjugal transfer protein TraK (plasmid) [ <i>Escherichia coli</i> ]  |
| <i>traJ</i>      | 87569-86421   | 382  | 100 | 1-382/382        | conjugative transfer protein (plasmid) [ <i>Escherichia coli</i> ]    |
| <i>traI</i>      | 88384-87566   | 272  | 100 | 1-272/272        | plasmid conjugative transfer protein TraI [ <i>Escherichia coli</i> ] |
| <i>traF</i>      | 91080-89878   | 400  | 100 | 1-400/400        | conjugal transfer protein TraF [ <i>Escherichia coli</i> ]            |
| <i>traE</i>      | 91989-91165   | 274  | 100 | 1-274/274        | plasmid conjugative transfer protein TraE [ <i>Escherichia coli</i> ] |
| <i>rci</i>       | 93294-92140   | 384  | 99  | 1-384:12-395/384 | Shufflon-specific DNA recombinase, Rci [ <i>Escherichia coli</i> ]    |
| <i>pilV</i>      | 96348-95239   | 369  | 100 | 1-369/369        | conjugal transfer protein pilV [ <i>Escherichia coli</i> ]            |
| <i>pilU</i>      | 97019-96336   | 227  | 100 | 1-227/227        | conjugal transfer prepilin peptidase PilU [ <i>Escherichia coli</i> ] |
| <i>pilR</i>      | 99276-98179   | 365  | 100 | 1-365/365        | conjugal transfer protein PilR [ <i>Escherichia coli</i> ]            |
| <i>pilQ</i>      | 99289-100842  | 517  | 100 | 1-517/517        | conjugal transfer protein PilQ [ <i>Escherichia coli</i> ]            |
| <i>pilO</i>      | 103923-102628 | 431  | 100 | 1-431/431        | conjugative transfer protein PilO [ <i>Escherichia coli</i> ETEC]     |
| <i>pilN</i>      | 105598-103916 | 560  | 100 | 1-560/560        | Incl1 conjugal transfer protein PilN [ <i>Escherichia coli</i> ]      |

|             |               |     |     |           |                                                               |
|-------------|---------------|-----|-----|-----------|---------------------------------------------------------------|
| <i>pilL</i> | 107116-106049 | 355 | 100 | 1-355/355 | conjugal transfer protein PilL [ <i>Escherichia coli</i> ]    |
| <i>traC</i> | 110070-109387 | 227 | 100 | 1-227/227 | conjugal TraC protein [ <i>Escherichia coli</i> ETEC 1392/75] |

---

<sup>a</sup>aa, amino acids.

<sup>b</sup>Query alignment region:match alignment region/total aa of the match.
